# Supplementary material for: Allometry and Ecology of the Bilaterian Gut Microbiome
Source: PubMed Central journal article supplement (PMC5874926; doi:10.1128/mbio.00319-18), 2018-03-27
Supplement: mbo002183790sf3.pdf [file mbo002183790sf3.pdf]

**Figure S3**

**A**

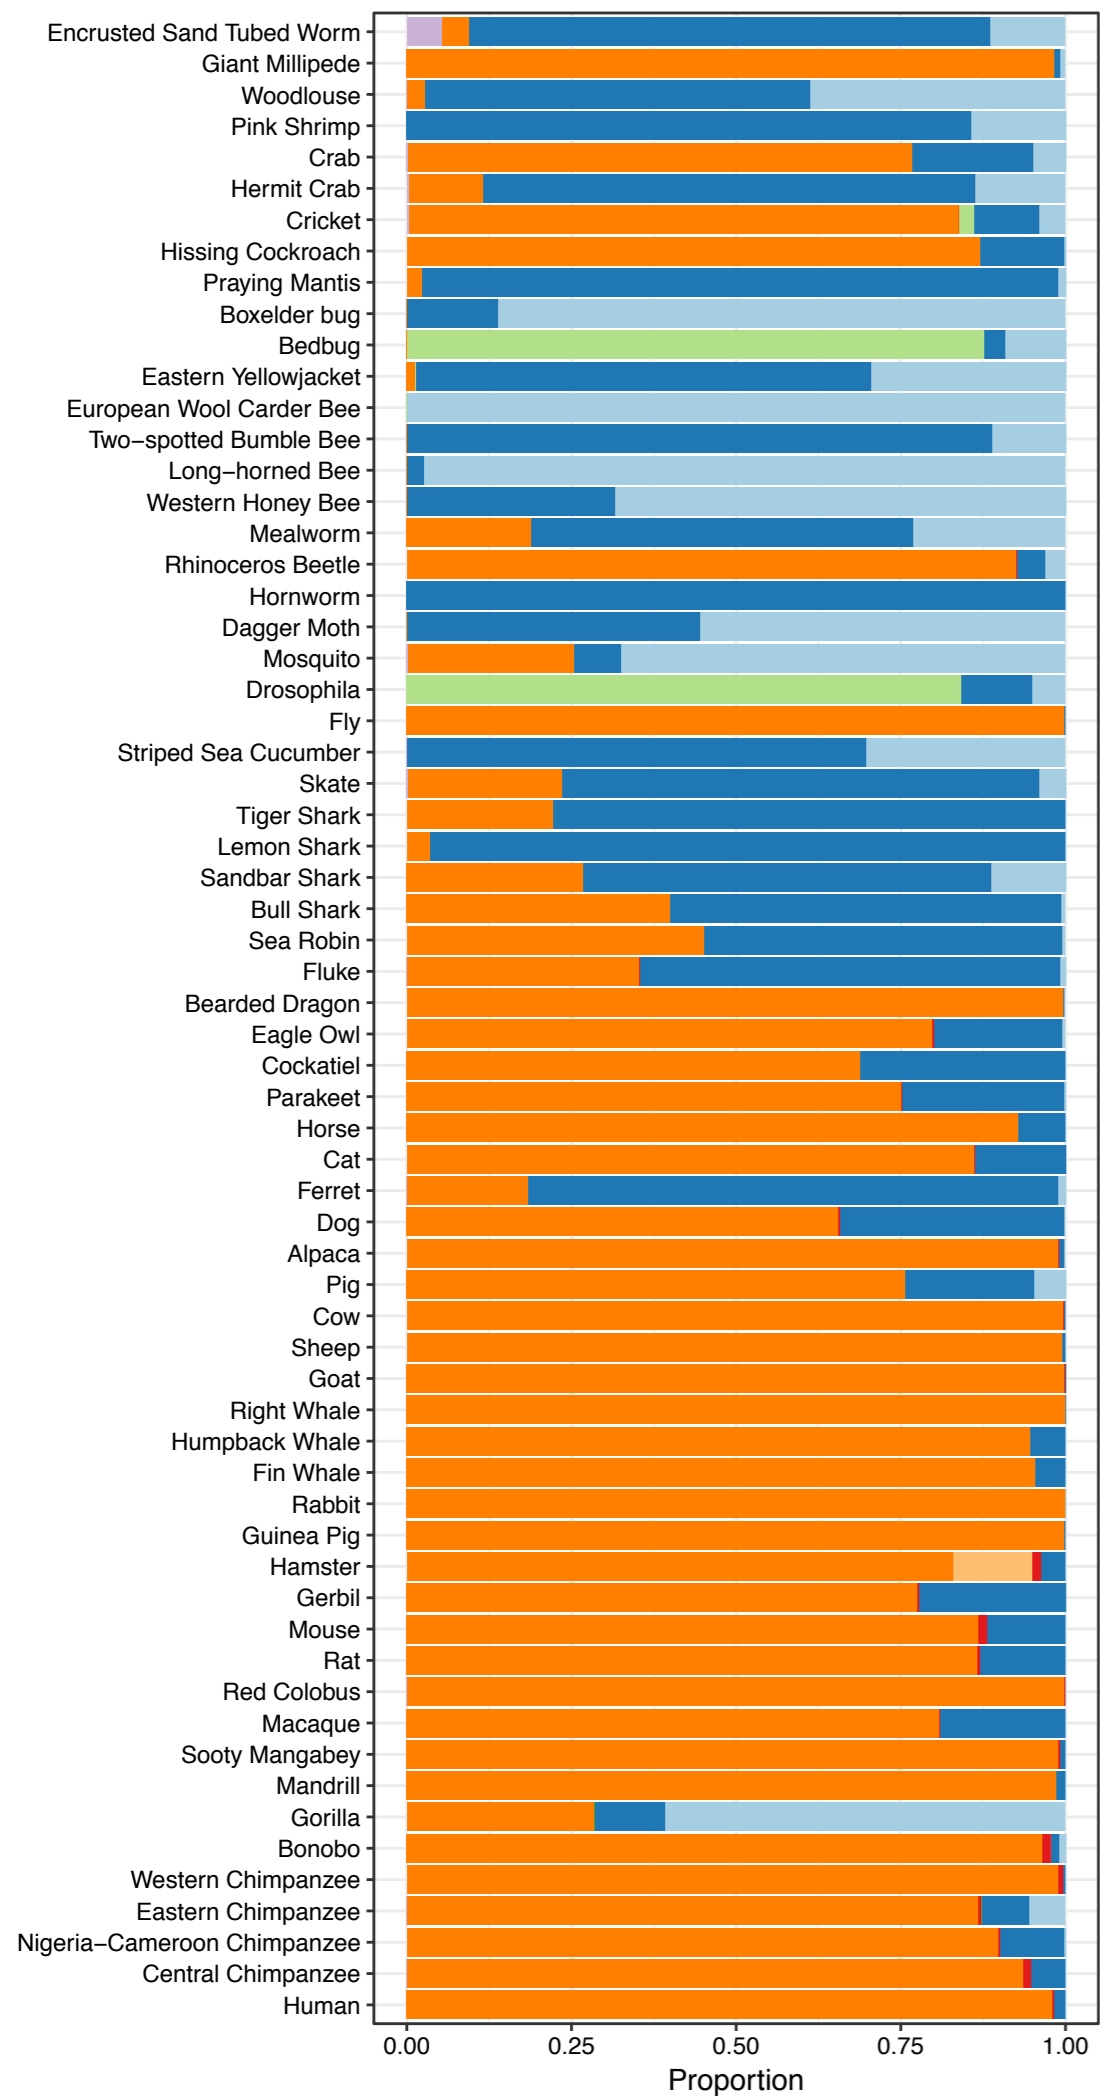

**B**

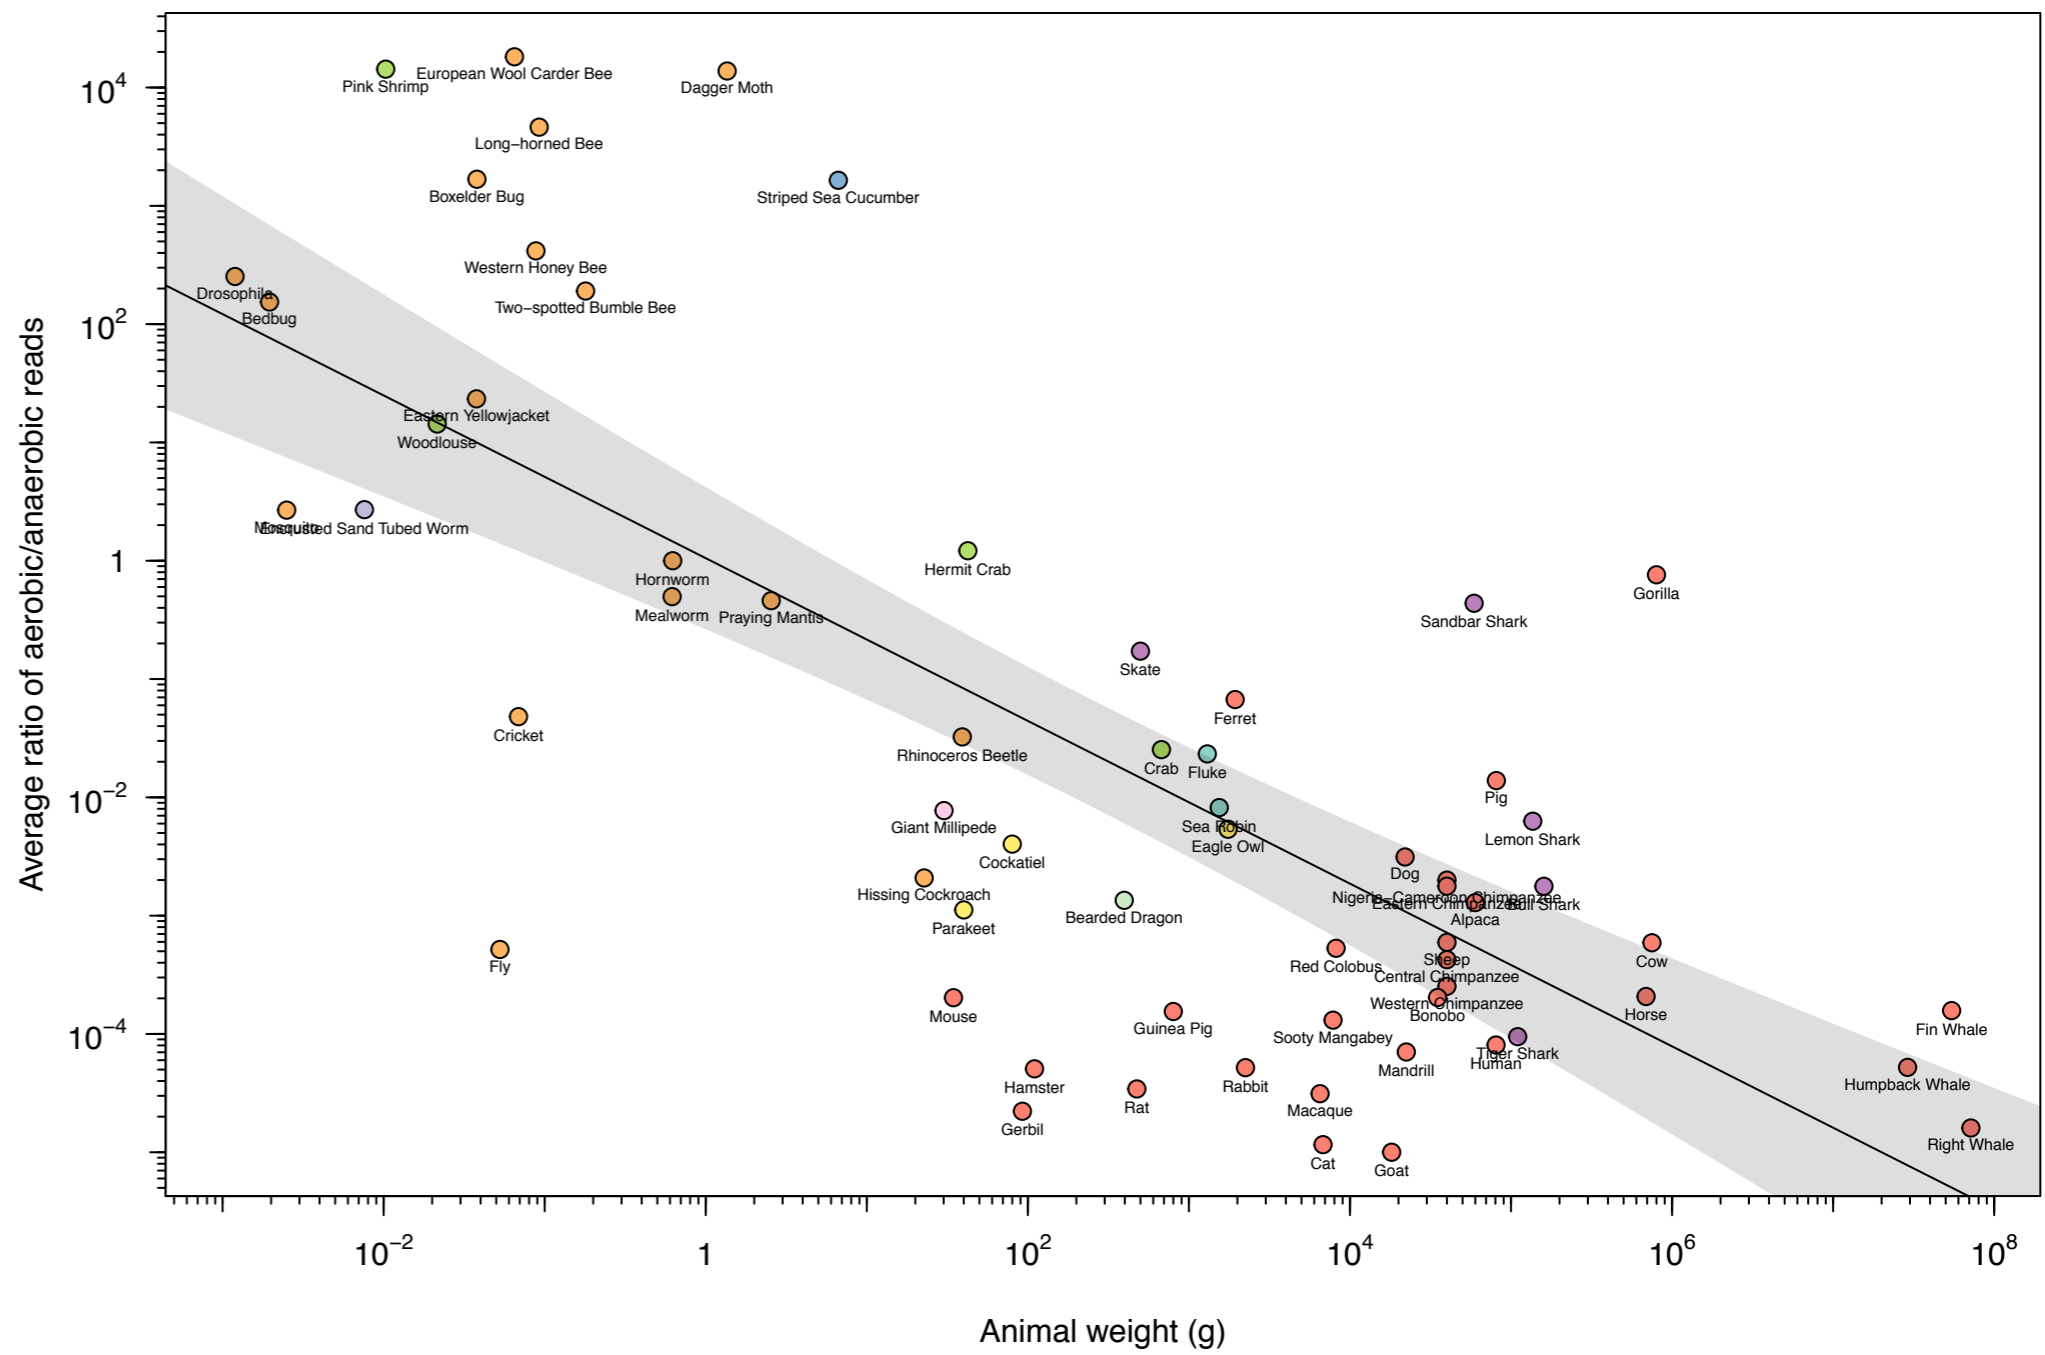

- aerobe
- facultative anaerobe
- intracellular
- microaerobe
- microaerobe or aerobe
- microaerobe or anaerobe
- no omic assignment
- obligate anaerobe
- variable
