# Supplementary material for: Allometry and Ecology of the Bilaterian Gut Microbiome
Source: PubMed Central journal article supplement (PMC5874926; doi:10.1128/mbio.00319-18), 2018-03-27

Figure S5

A

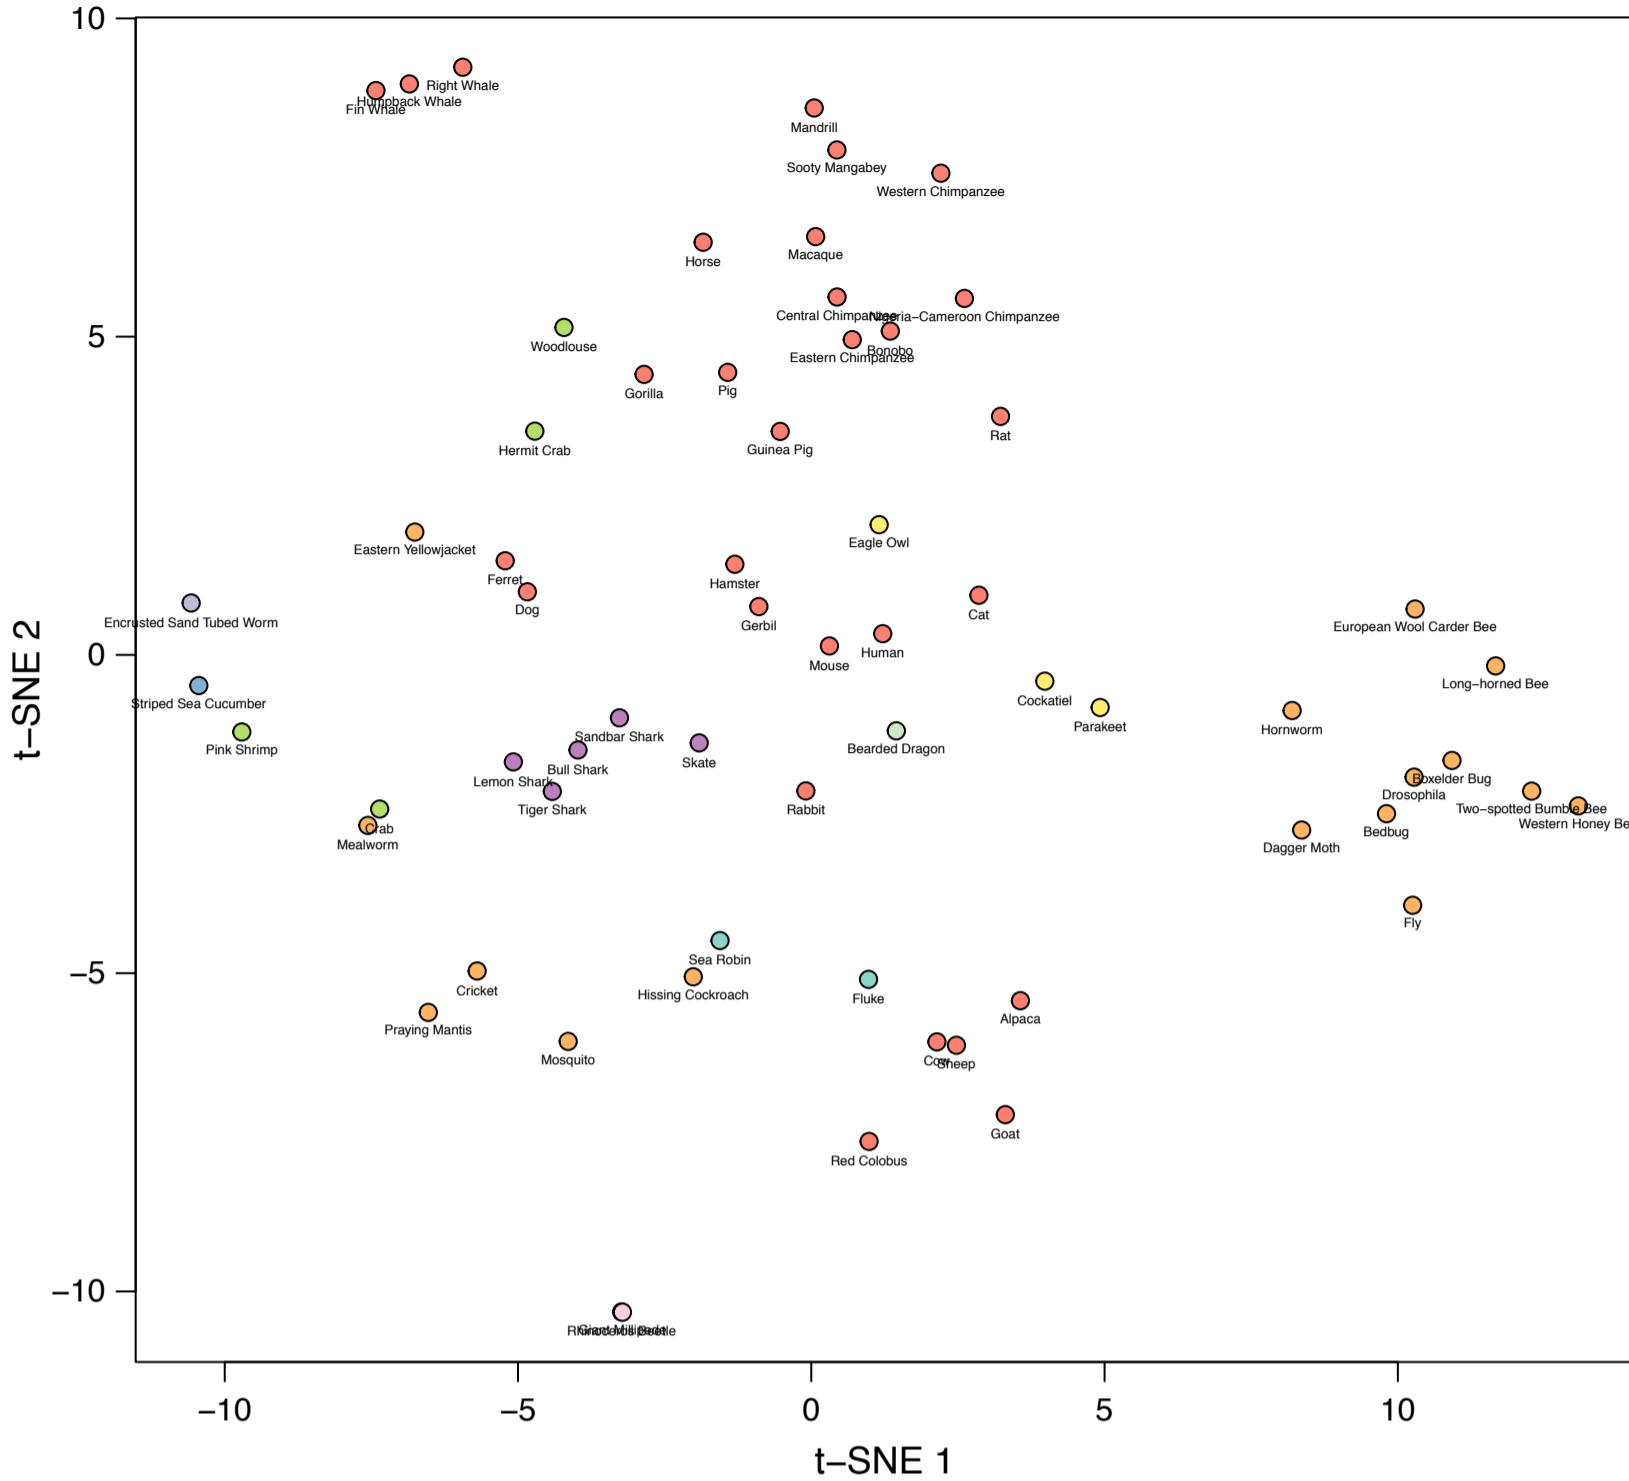

B

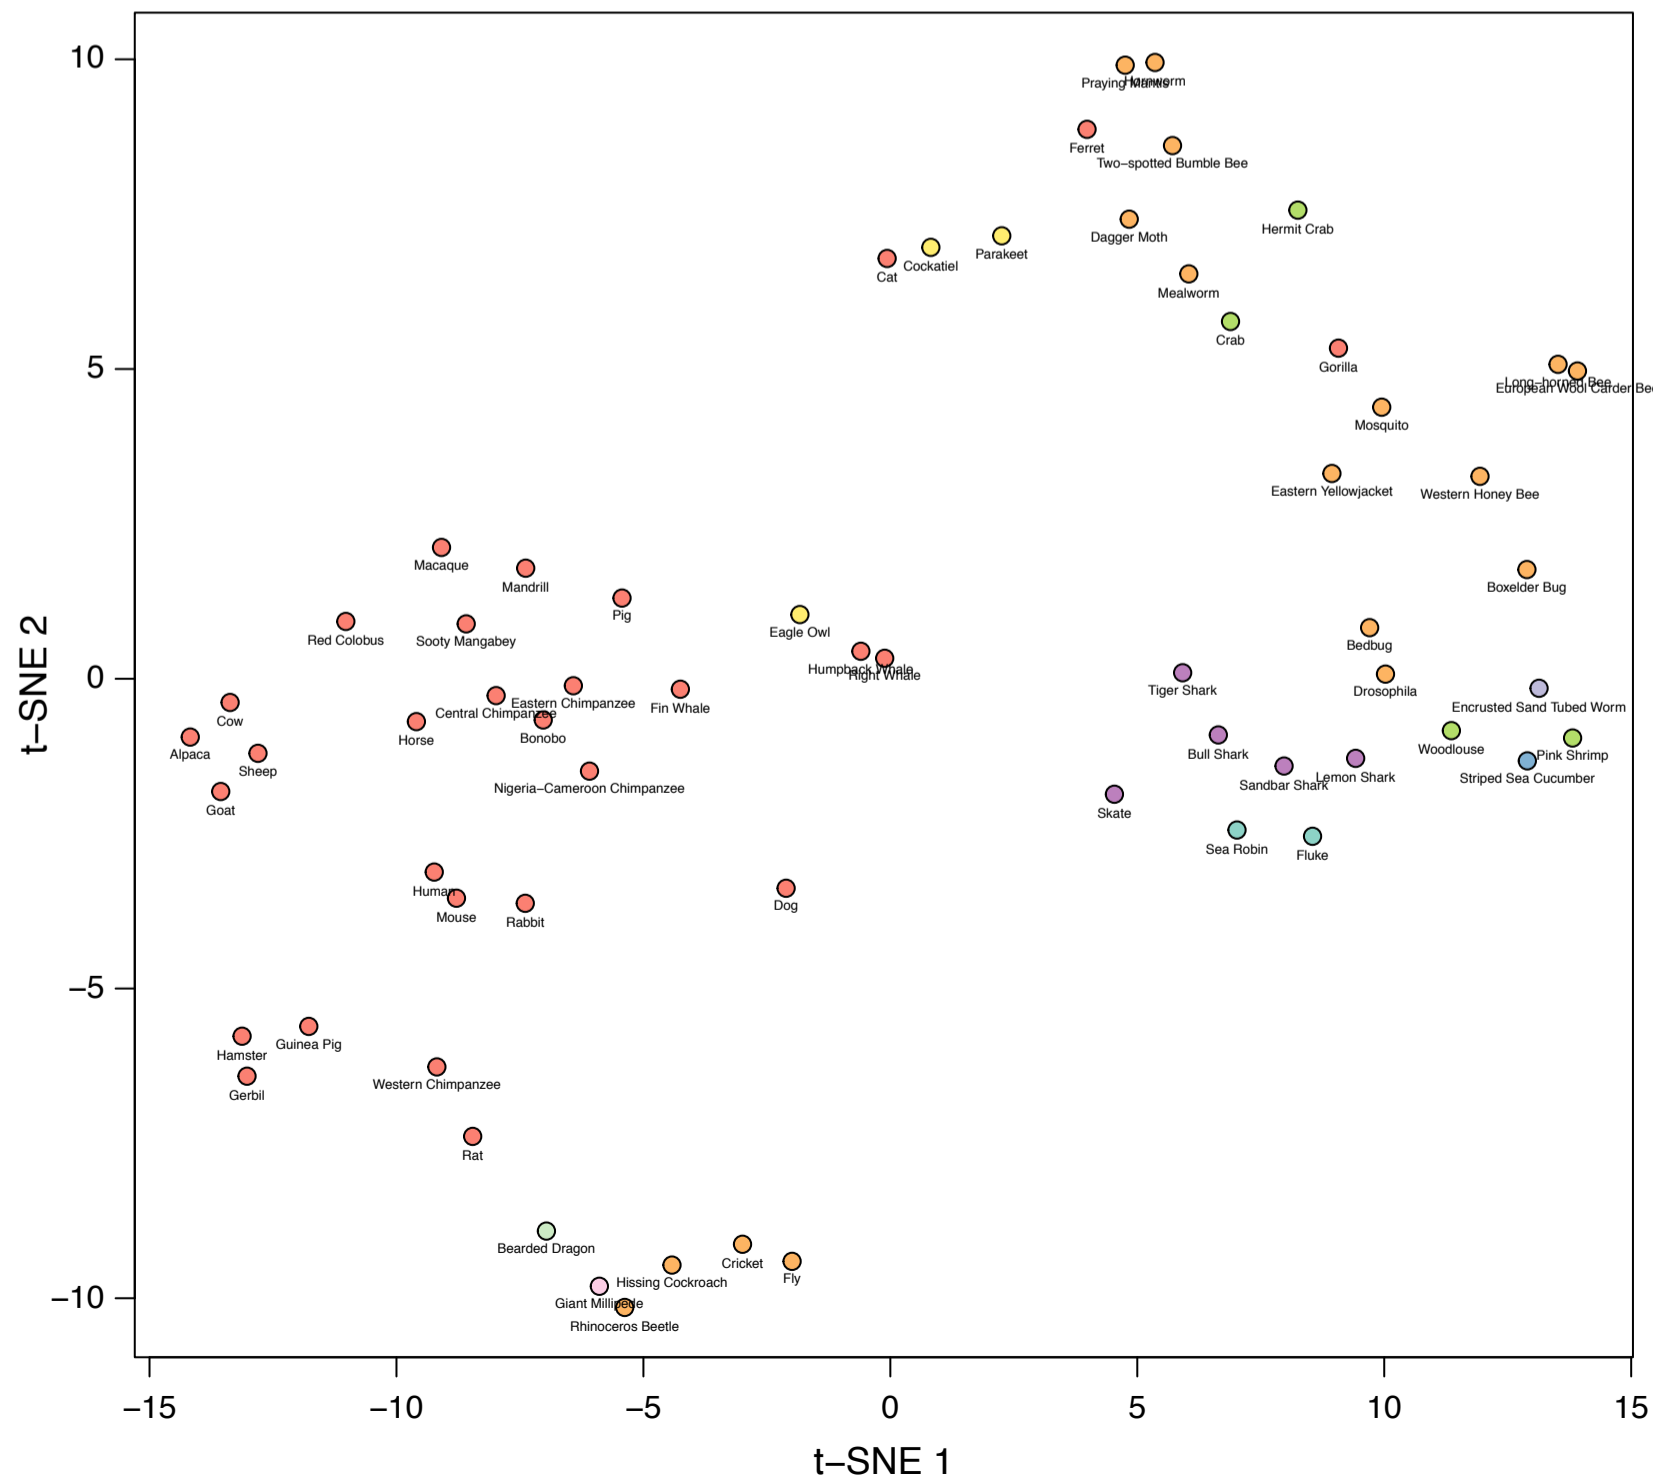

Supplement: mbo002183790sf5.pdf [file mbo002183790sf5.pdf]
